# Supplementary material for: Effect of Algorithmic Music Listening on Cardiac Autonomic Nervous System Activity: An Exploratory, Randomized Crossover Study
Source: J Clin Med. 2022 Sep 28;11(19):5738. doi: 10.3390/jcm11195738 (PMC9571939; doi:10.3390/jcm11195738)
Supplement: Supplementary file 1 [file jcm-11-05738-s001.zip]

Archive with 5 entries (5 files):
- Audio Sample 1_Cello_relaxing.mp3
- Audio Sample 2_Cello_activating.mp3
- Audio Sample 3_Clarinet_relaxing.mp3
- Audio Sample 4_Clarinet_activating.mp3
- Supplementary_Materials_Tables S1 and S2.pdf
